# Supplementary material for: A Potential Anthelmintic Phytopharmacological Source of Origanum vulgare (L.) Essential Oil against Gastrointestinal Nematodes of Sheep
Source: MDPI journal article supplement (doi:10.3390/ani13010045), 2022-12-22
Supplement: s1 [file s1]

**Table S1.** Impact of *Origanum vulgare* essential oil on the haematological parameters in tested animals – in total from both examined farms.

| Parameters  | Reference Values | Day | <i>Origanum vulgare</i> EO | Albendazole, Control (+) | Sunflower oil, Control (-) |
|-------------|------------------|-----|----------------------------|--------------------------|----------------------------|
| WBC (K/uL)  | 4.0 - 12.0       | 0.  | 8.21 ± 1.8                 | 9.59 ± 1.6               | 8.78 ± 2.9                 |
|             |                  | 14. | 8.82 ± 2.0                 | 9.45 ± 2.6               | 8.74 ± 2.3                 |
| RBC (M/uL)  | 8.0 - 16.0       | 0.  | 8.1 ± 0.9                  | 7.50 ± 0.5               | 8.01 ± 1.0                 |
|             |                  | 14. | 7.58 ± 1.0                 | 7.66 ± 0.6               | 7.45 ± 1.1                 |
| Hgb (g/dL)  | 8.0 - 16.0       | 0.  | 11.35 ± 1.6                | 10.43 ± 0.5              | 11.65 ± 1.8                |
|             |                  | 14. | 11.0 ± 1.6                 | 11.08 ± 0.8              | 10.96 ± 1.7                |
| Hct (%)     | 24.0 - 50.0      | 0.  | 28.37 ± 4.1                | 26.41 ± 1.6              | 29.38 ± 4.7                |
|             |                  | 14. | 26.63 ± 3.6                | 27.30 ± 1.8              | 27.35 ± 4.2                |
| MCV (fL)    | 23.0 - 48.0      | 0.  | 35.0 ± 2.1                 | 35.17 ± 1.7              | 36.75 ± 2.4                |
|             |                  | 14. | 35.08 ± 2.3                | 35.67 ± 2.0              | 36.75 ± 1.8                |
| MCH (Pg)    | 9.0 - 12.0       | 0.  | 13.95 ± 0.7                | 13.94 ± 0.6              | 14.56 ± 0.8                |
|             |                  | 14. | 14.5 ± 0.8                 | 14.52 ± 0.7              | 14.73 ± 0.8                |
| MCHC (g/dL) | 31.0 - 38.0      | 0.  | 39.97 ± 1.5                | 39.53 ± 1.0              | 39.69 ± 0.8                |
|             |                  | 14. | 41.26 ± 1.0                | 40.45 ± 0.7              | 40.14 ± 0.9                |
| RDW (%)     | -                | 0.  | 16.11 ± 0.8                | 15.52 ± 0.5              | 15.93 ± 0.7                |
|             |                  | 14. | 15.93 ± 0.6                | 15.77 ± 0.5              | 15.69 ± 0.8                |
| Pit (K/uL)  | 250 - 750        | 0.  | 763.4 ± 220.3              | 517.0 ± 119.0            | 545.1 ± 189.1              |
|             |                  | 14. | 631.2 ± 207.8              | 468.2 ± 142.0            | 483.0 ± 207.7              |
| MPV (fL)    | -                | 0.  | 11.77 ± 1.5                | 11.34 ± 1.5              | 11.13 ± 1.3                |
|             |                  | 14. | 11.73 ± 1.8                | 11.42 ± 1.6              | 10.78 ± 1.3                |
| Pct (%)     | -                | 0.  | 0.60 ± 0.1                 | 0.60 ± 0.6               | 0.58 ± 0.2                 |
|             |                  | 14. | 0.60 ± 0.2                 | 0.54 ± 0.2               | 0.46 ± 0.1                 |
| PDW (%)     | -                | 0.  | 5.98 ± 9.3                 | 5.43 ± 4.5               | 5.83 ± 8.0                 |
|             |                  | 14. | 5.77 ± 8.7                 | 4.59 ± 5.0               | 9.23 ± 9.6                 |
| Lin (K/uL)  | -                | 0.  | 4.63 ± 1.1                 | 4.94 ± 1.3               | 4.16 ± 1.1                 |
|             |                  | 14. | 4.72 ± 1.3                 | 5.41 ± 2.5               | 4.73 ± 1.6                 |
| Lin (%)     | 40 - 75%         | 0.  | 56.67 ± 7.2                | 51.83 ± 12.0             | 52.83 ± 12.3               |
|             |                  | 14. | 55.60 ± 8.8                | 56.42 ± 17.1             | 54.17 ± 6.8                |
| Gra (K/uL)  | -                | 0.  | 3.58 ± 1.1                 | 4.65 ± 1.4               | 4.09 ± 2.4                 |
|             |                  | 14. | 4.09 ± 1.3                 | 4.04 ± 1.7               | 4.01 ± 1.2                 |
| Gra (%)     | -                | 0.  | 43.33 ± 7.2                | 48.17 ± 12.0             | 47.17 ± 12.3               |
|             |                  | 14. | 44.40 ± 8.8                | 43.58 ± 17.1             | 45.83 ± 6.8                |

\* No statistically significant differences were found when comparing values on D14 compared to D0, nor when comparing values for different groups on the same day (p>0.05).
